# Supplementary material for: Tunable photocurrent switching behavior of a ZnO/Cu2O heterojunction photodetector to realize bipolar binary photoresponse
Source: Royal Society of Chemistry journal article supplement (doi:10.1039/d1tc00818h), 2021-01-01
Supplement: d1tc00818h1.pdf [file d1tc00818h1.pdf]

**Supporting information**

**Tunable photocurrent switching behavior of ZnO/Cu<sub>2</sub>O**

**heterojunction photodetector to realize bipolar binary photoresponse**

*Yichen Bu, Shaobo Shi, Jing Chen, Menghan Li, Qiuyang Zhang, Pengcheng Yang, Jianghua Xu, Xiaosong Zhang, Lina Kong and Lan Li, Jianping Xu\*, Kun Li\**

School of Materials Science and Engineering, Key Laboratory of Display Materials and Photoelectric Devices, Ministry of Education and Tianjin Key Laboratory for Photoelectric Materials and Devices, Tianjin University of Technology, Tianjin 300384, China.

School of Science, Tianjin University of Technology, Tianjin 300384, China.

Tianjin Key Laboratory of Film Electronic and Communication Device, Tianjin University of Technology, Tianjin 300384, China.

School of Science, Tianjin University of Technology and Education, Tianjin 300222, China.

\*E-mail: [xjp0335@163.com](mailto:xjp0335@163.com) (Jianping Xu)

\* E-mail: [likun\\_tjut@163.com](mailto:likun_tjut@163.com) (Kun Li)

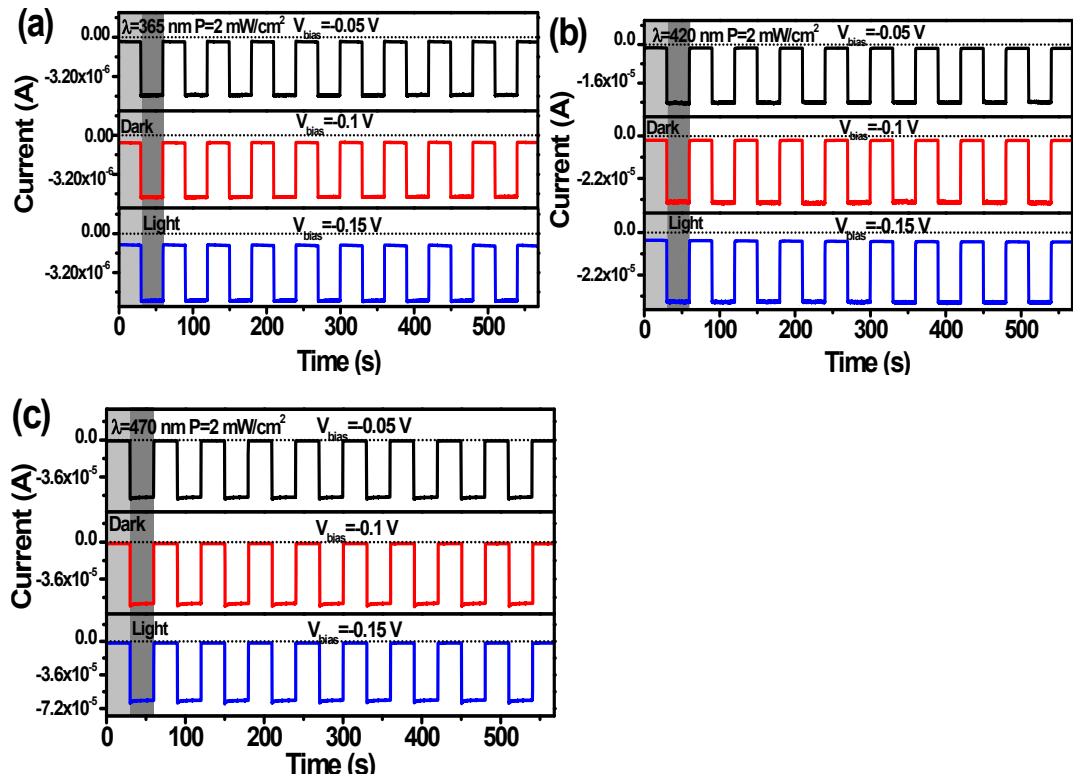

Fig.S1 I-t curves under the forward bias with the light intensity of 2 mW/cm<sup>2</sup> for (a) 365 nm, (b) 420 nm, (c) 470 nm UV and visible light.

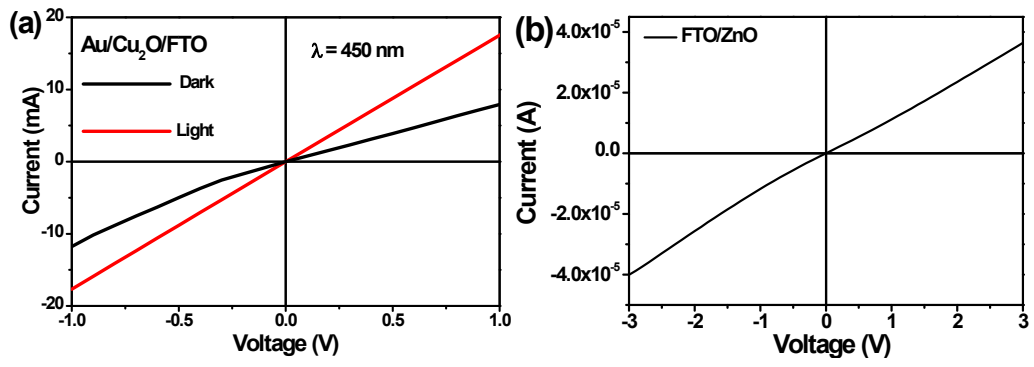

Fig.S2(a) I-V curve of ZnO/Cu<sub>2</sub>O heterojunction device in dark state, the inset is the I-V curve of Au/Cu<sub>2</sub>O/FTO, (b) I-V curve of FTO/ZnO/FTO in dark state

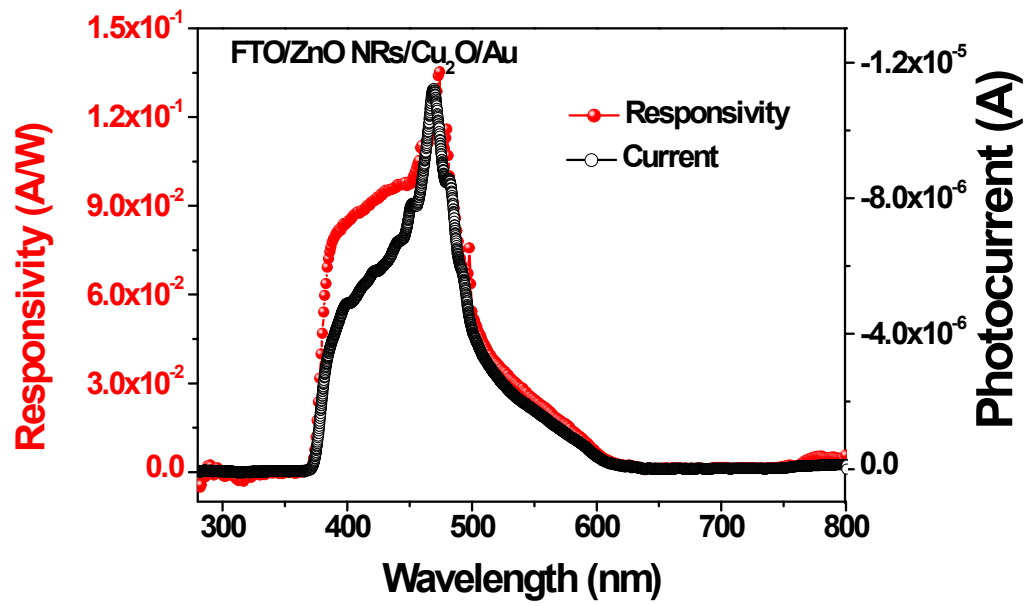

Fig.S3 The typical photocurrent and photoresponse of the device under different wavelengths of light without applied bias.

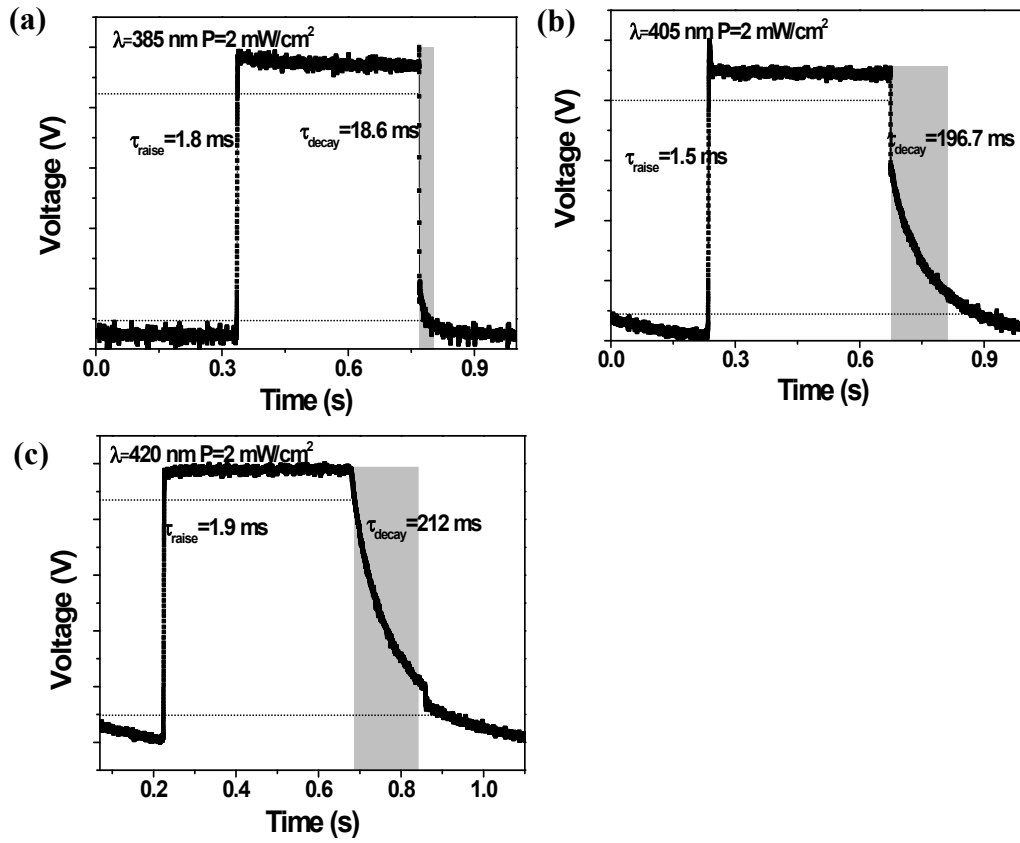

Fig.S4 The photoresponse time of the PD under (a) 385 nm, (b) 405 nm, (c) 420 nm UV and visible light illumination with the light intensity of  $2 \text{ mW/cm}^2$ .

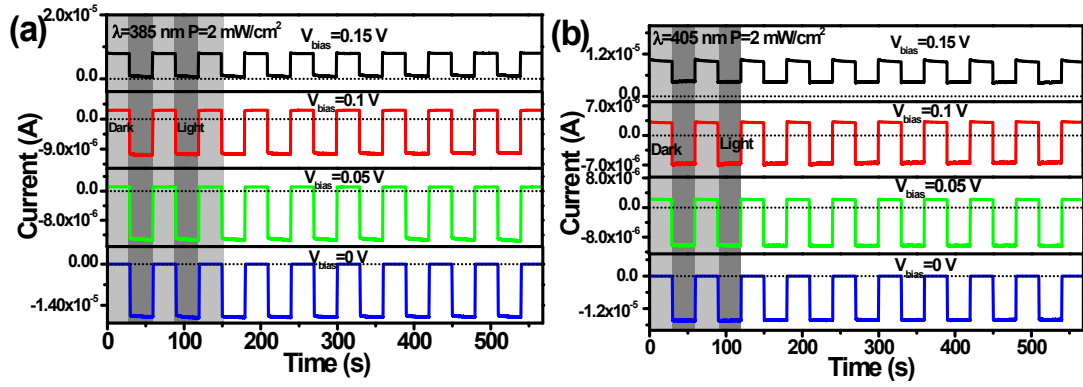

Fig.S5 I-t curves under different bias voltages and (a) 385 nm and (b) 405 nm light illuminations with the intensity of  $2\text{ mW/cm}^2$ .

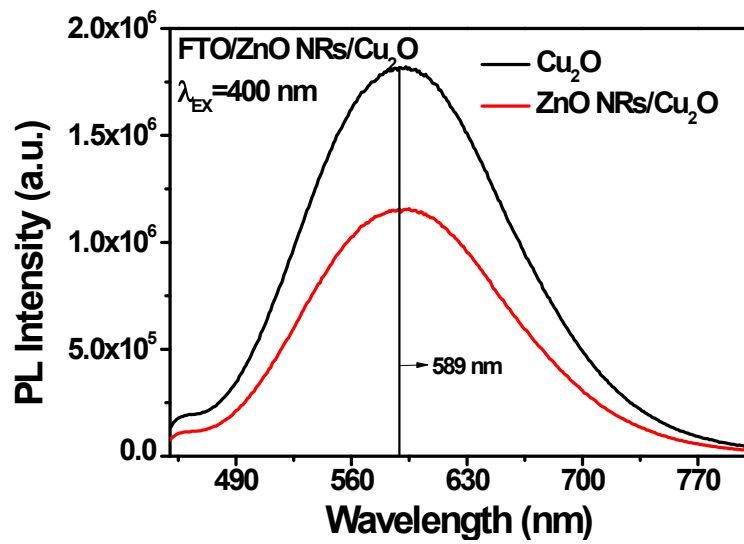

Fig.S6 PL spectra of ZnO NRs/Cu<sub>2</sub>O and Cu<sub>2</sub>O film excited by 400 nm light

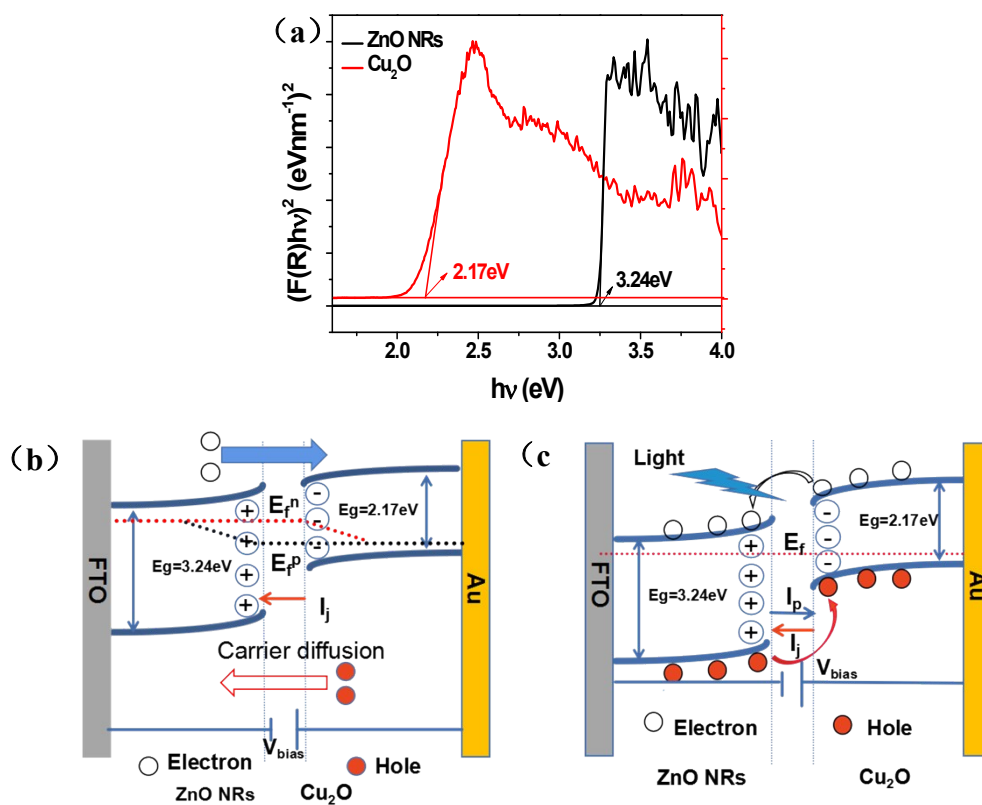

Fig.S7 (a) The estimated band gap energy from the UV-visible absorption spectra. Energy level structure diagrams of the PD under (b) applied bias voltage condition and (c) under light illumination and applied bias voltage conditions.



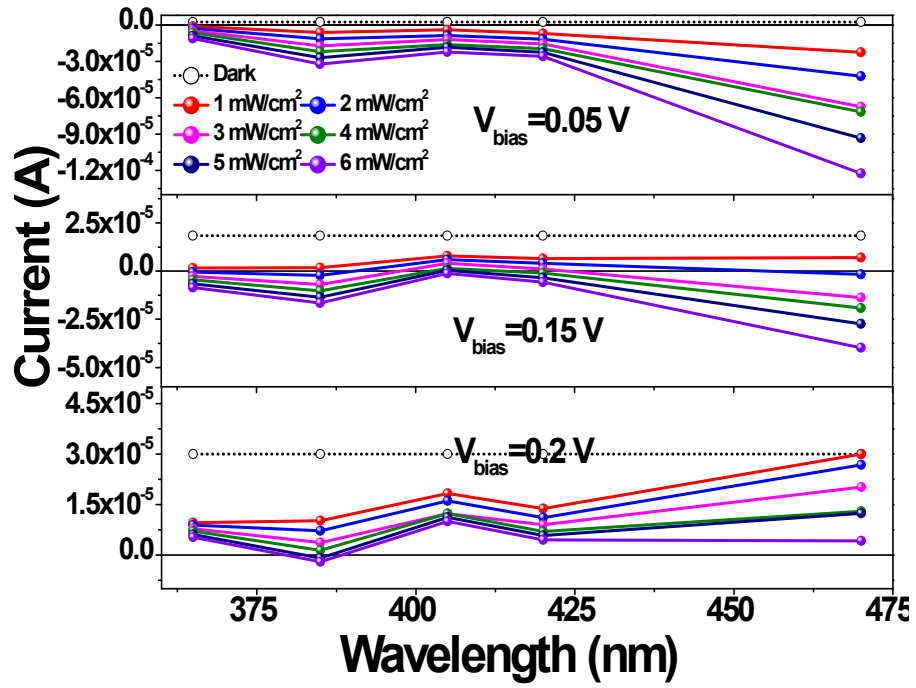

Fig.S8 The PD current curves under different light wavelengths and light intensity by applied 0.05,0.15 and 0.2 V bias voltage.
